# Supplementary material for: A compact stem-loop DNA aptamer targets a uracil-binding pocket in the SARS-CoV-2 nucleocapsid RNA-binding domain
Source: PubMed Central journal article supplement (PMC11602162; doi:10.1093/nar/gkae874), 2024-10-09
Supplement: gkae874_supplemental_file.pdf [file gkae874_supplemental_file.pdf]

**A compact stem-loop DNA aptamer targets a uracil-binding pocket in the SARS-CoV-2 nucleocapsid RNA-binding domain**

Esler, Belica *et al.*

This PDF file includes:

|                                                                                                      |          |
|------------------------------------------------------------------------------------------------------|----------|
| Figure S1: SEC binding analyses of various DNA and RNA aptamers to N-NTD or N-CTD                    | p.2 - 8  |
| Figure S2: SEC binding analyses of viral stem-loop RNA motifs to N-NTD                               | p.9 - 11 |
| Figure S3: SEC binding analyses of A58 aptamer derivatives to N-NTD (co-elution observed)            | p.12     |
| Figure S4: SEC binding analyses of A58 aptamer derivatives to N-NTD (co-elution not observed)        | p.13     |
| Figure S5: Electron density map for the N-NTD / A58-20 complex                                       | p.14     |
| Figure S6: Western blot of N-GFP and N-GFP Y109A proteins                                            | p.15     |
| Figure S7: Competitive binding of DNA and RNA motifs to N-NTD (individual graphs for data in Fig. 9) | p.16     |
| Table S1: Summary of $K_D$ values measured using fluorescence anisotropy                             | p.17     |
| Table S2: Summary of $K_i$ values estimated using a competition-based fluorescence anisotropy assay  | p.18     |

DNA aptamer A15 from Zhang et al., *Chem. Commun.* 2020, 56, 10235-10238  
GCTGGATGTTTCATGCTGGCAAATTCCTTAGGGGCACCGTTACTTTGACACATCCAGC

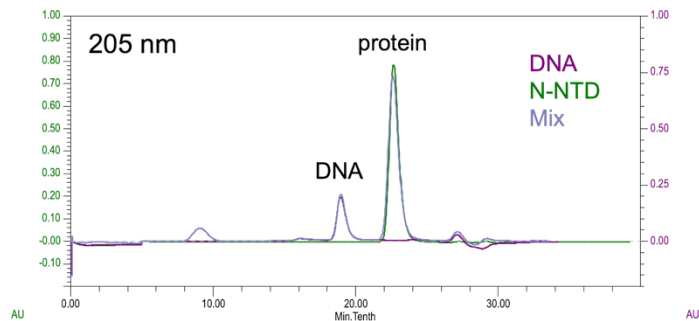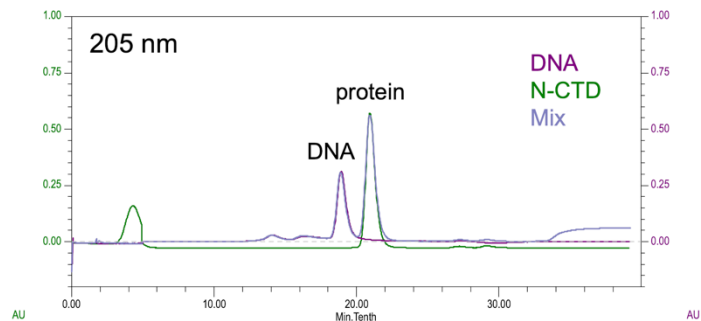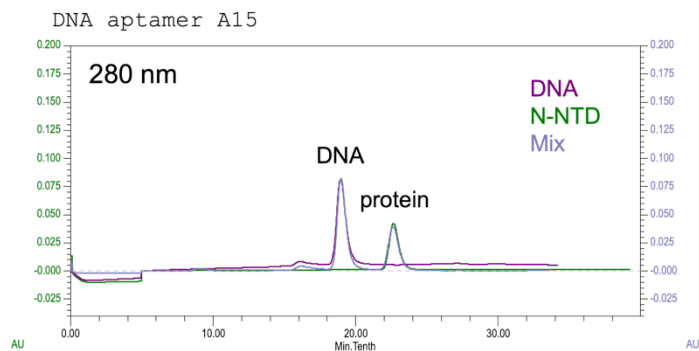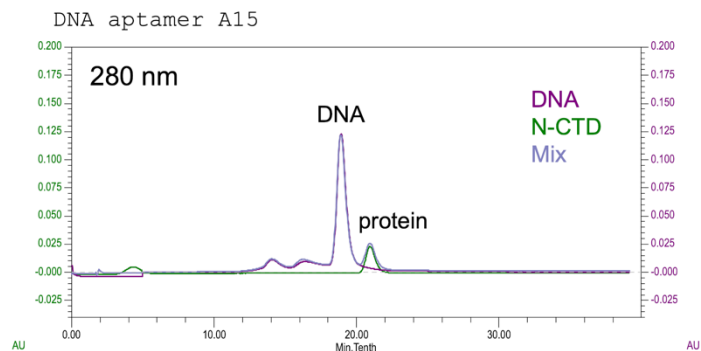

DNA aptamer A48 from Zhang et al., *Chem. Commun.* 2020, 56, 10235-10238  
GCTGGATGTCGCTTACGACAATATTCCTTAGGGGCACCGTACATTGACACATCCAGC

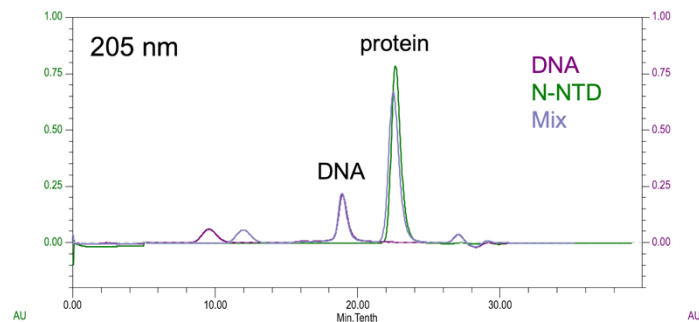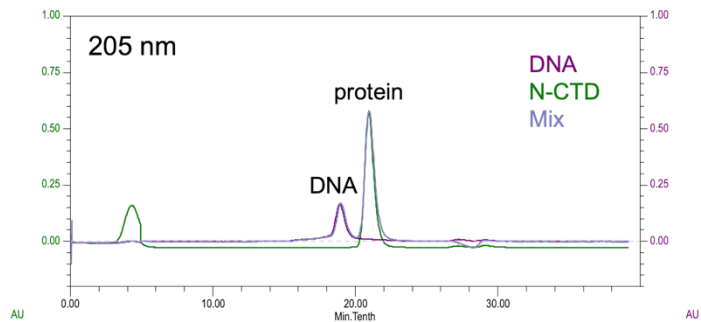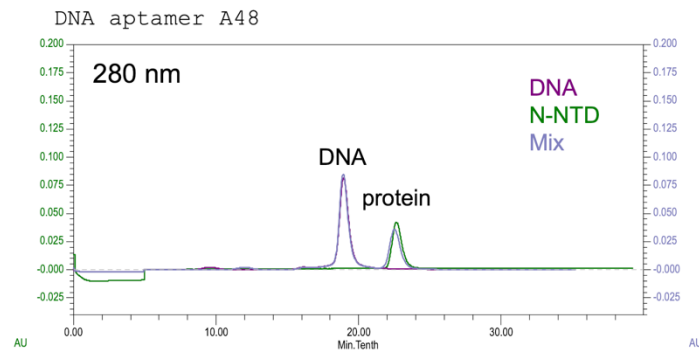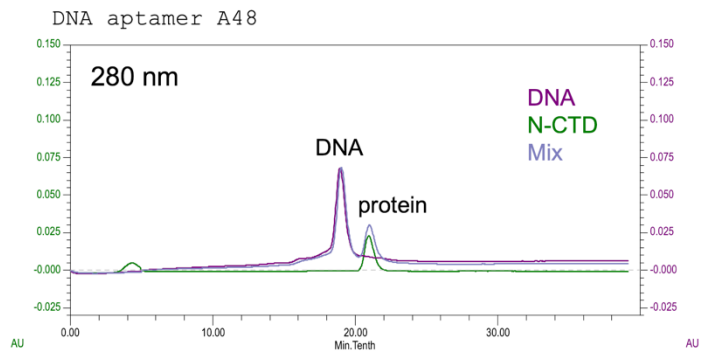

DNA aptamer A58 from Zhang et al., *Chem. Commun.* 2020, 56, 10235-10238  
GCTGGATGTCACCGGATTGTCGGACATCGGATTGTCTGAGTCATATGACACATCCAGC

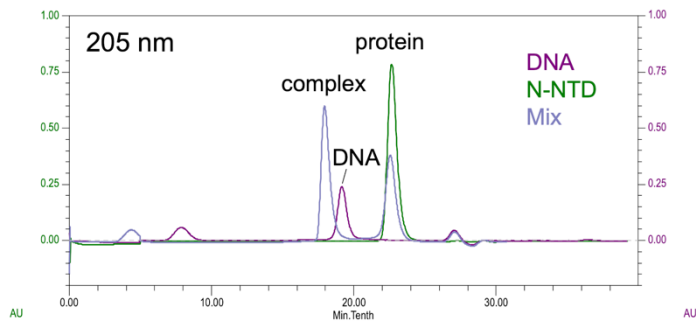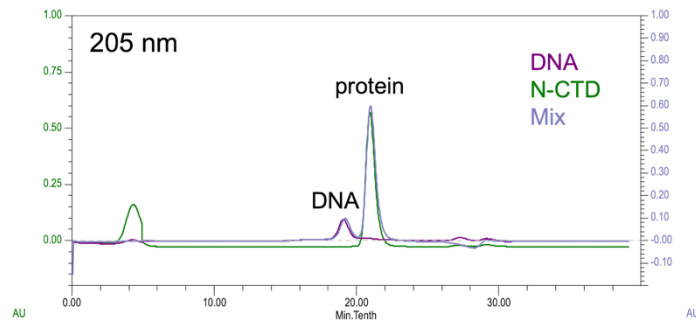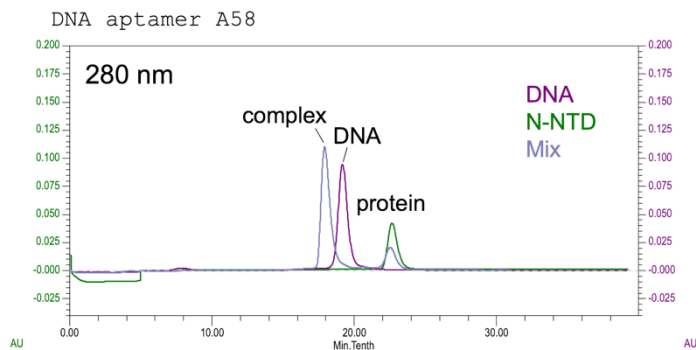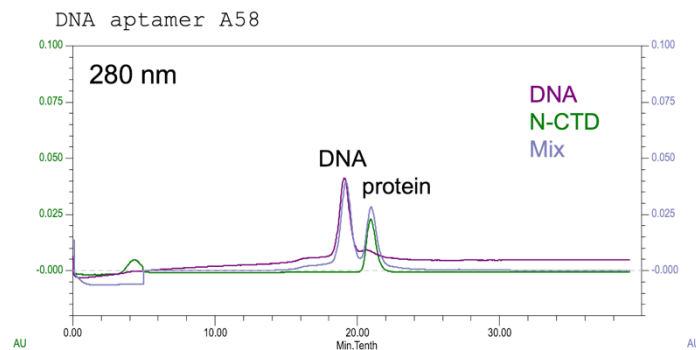

DNA aptamer A61 from Zhang et al., *Chem. Commun.* 2020, 56, 10235-10238  
GCTGGATGTTGACCTTTACAGATCGGATTCTGTGGGGCGTTAAACTGACACATCCAGC

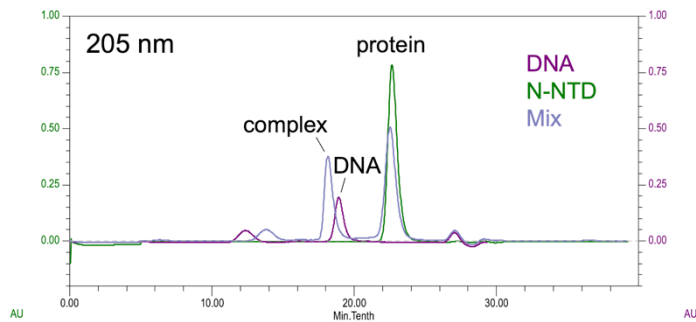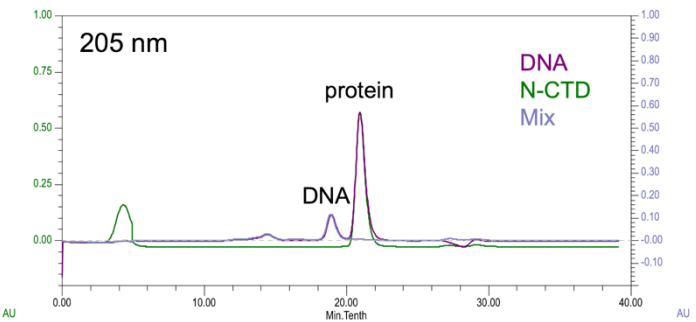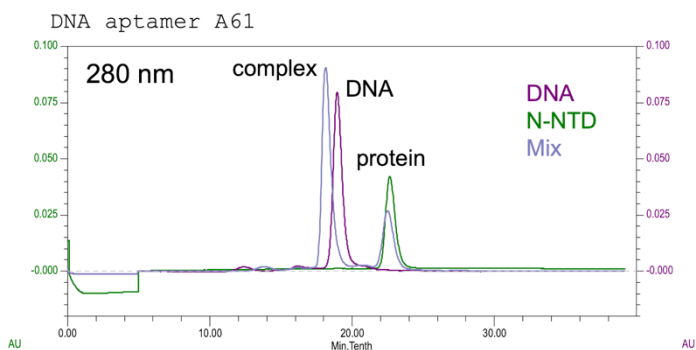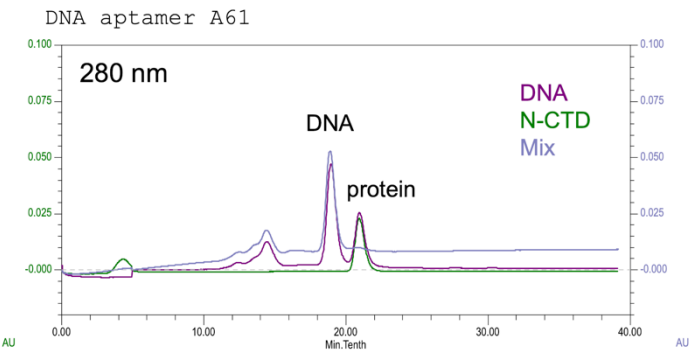

DNA aptamer 3 from Chen et al., *Viro. Sin.* 2020, 35, 351-354  
 GCAATGGTACGGTACTTCCGGATGCGGAAACTGGCTAATTGGTGAGGCTGGGGCGGT

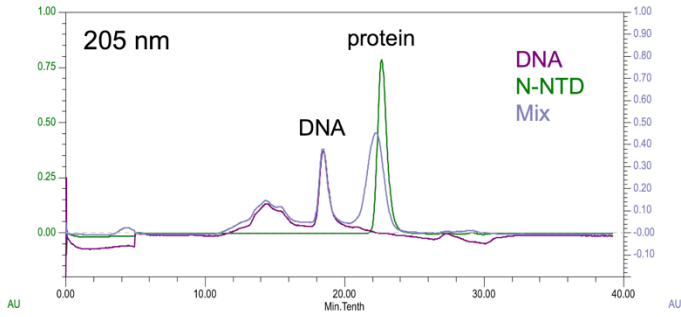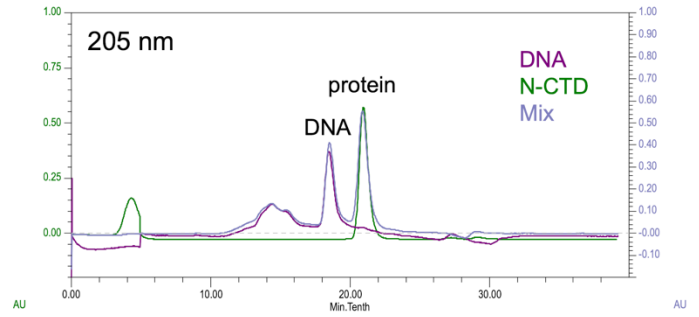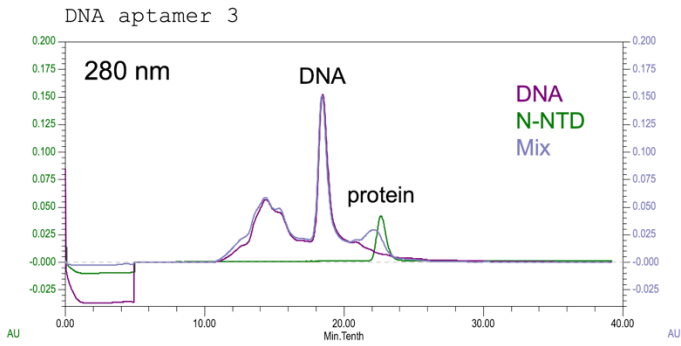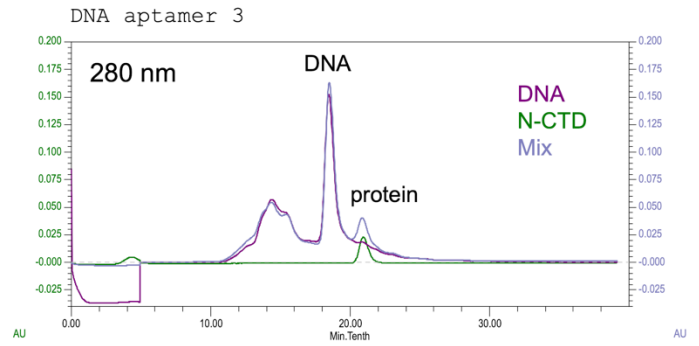

DNA aptamer 11 from Cho et al., *J Biosci Bioeng.* 2011, 112, 535-540  
 GCAATGGTACGGTACTTCCCCGTAGATCGAGGGAGCGCATTAAAGGTATACGCCCTCCCATCTTCAAAGTGCACGCTACTTTGCTAA

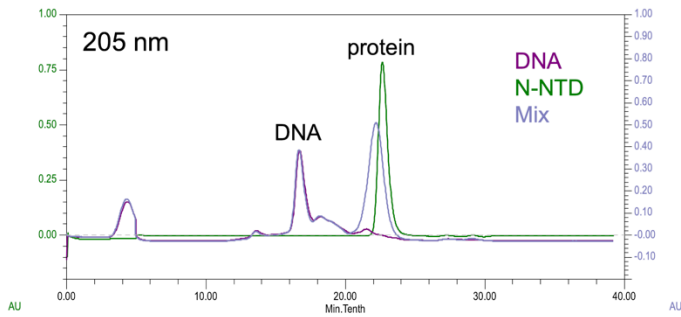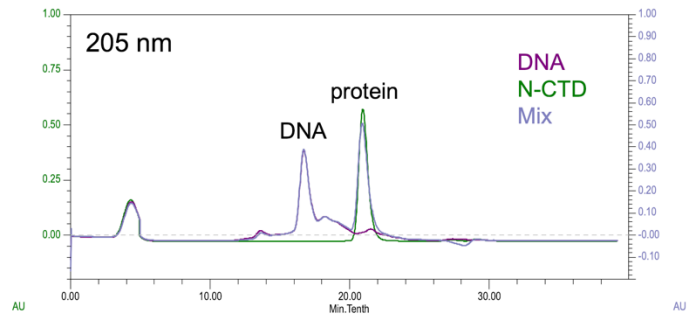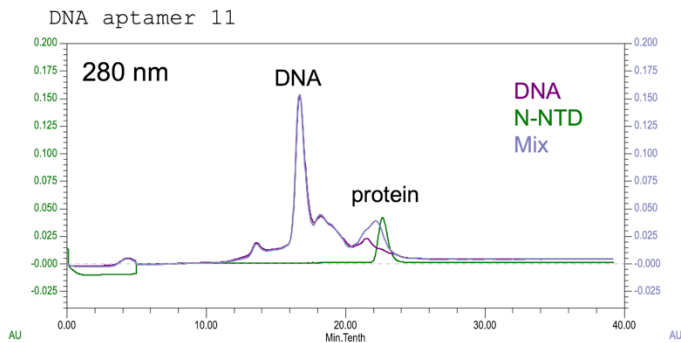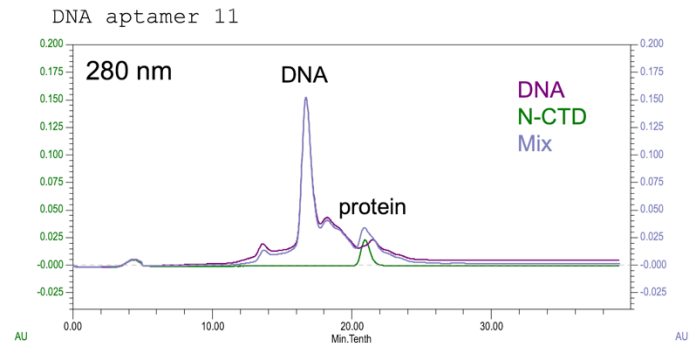

DNA aptamer from Kang et al., *Anal. Chem.* 2021, 93, 992-1000  
ATCCAGAGTGACGCAGCAAACCCAAGCAAACCTACCTCTATACCTTCGACCTTCATCATGGACACGGTGGCTTAGT

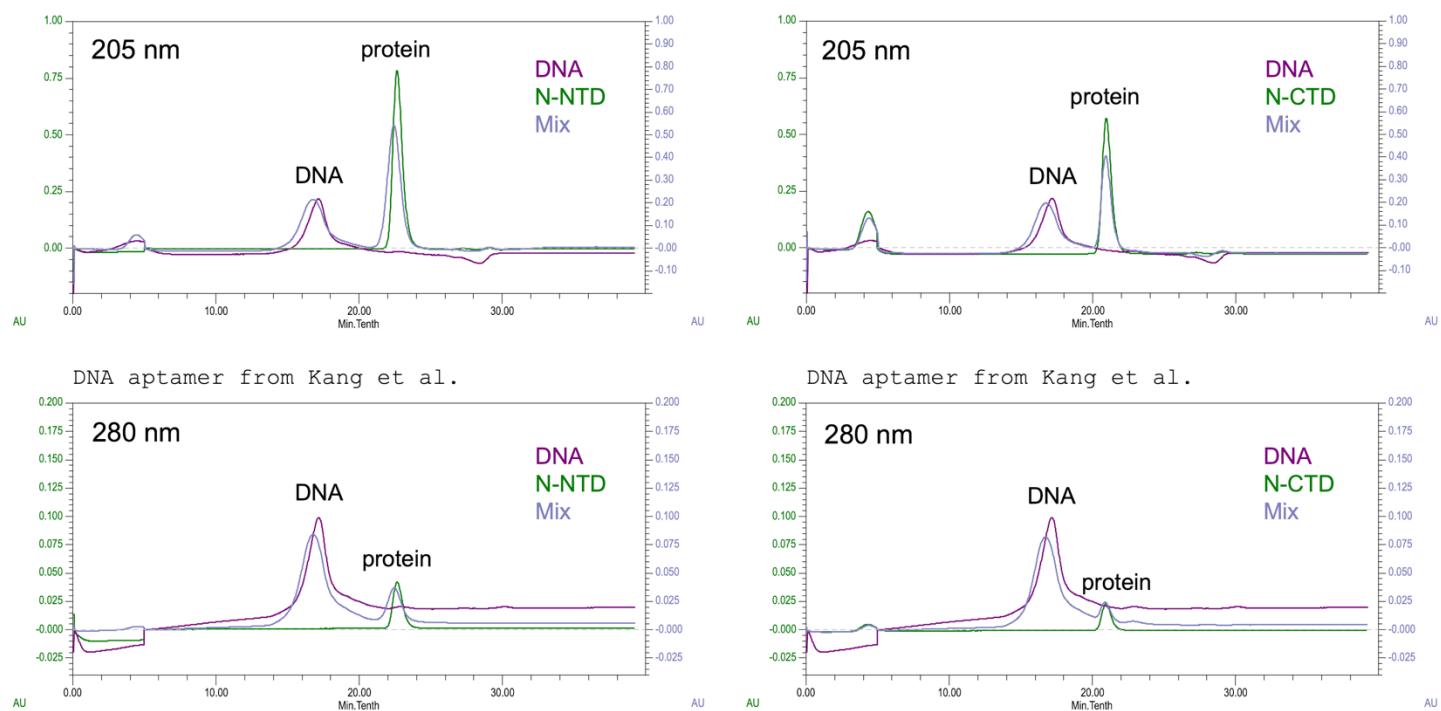

DNA aptamer 1 from Cho et al., *J Biosci Bioeng.* 2011, 112, 535-540

GCAATGGTACGGTACTTCCGGATGCGGAAACTGGCTAATTGGTGAGGCTGGGGCGGTCTGTGCAGCAAAAGTGCACGCTACTTTGCTAA

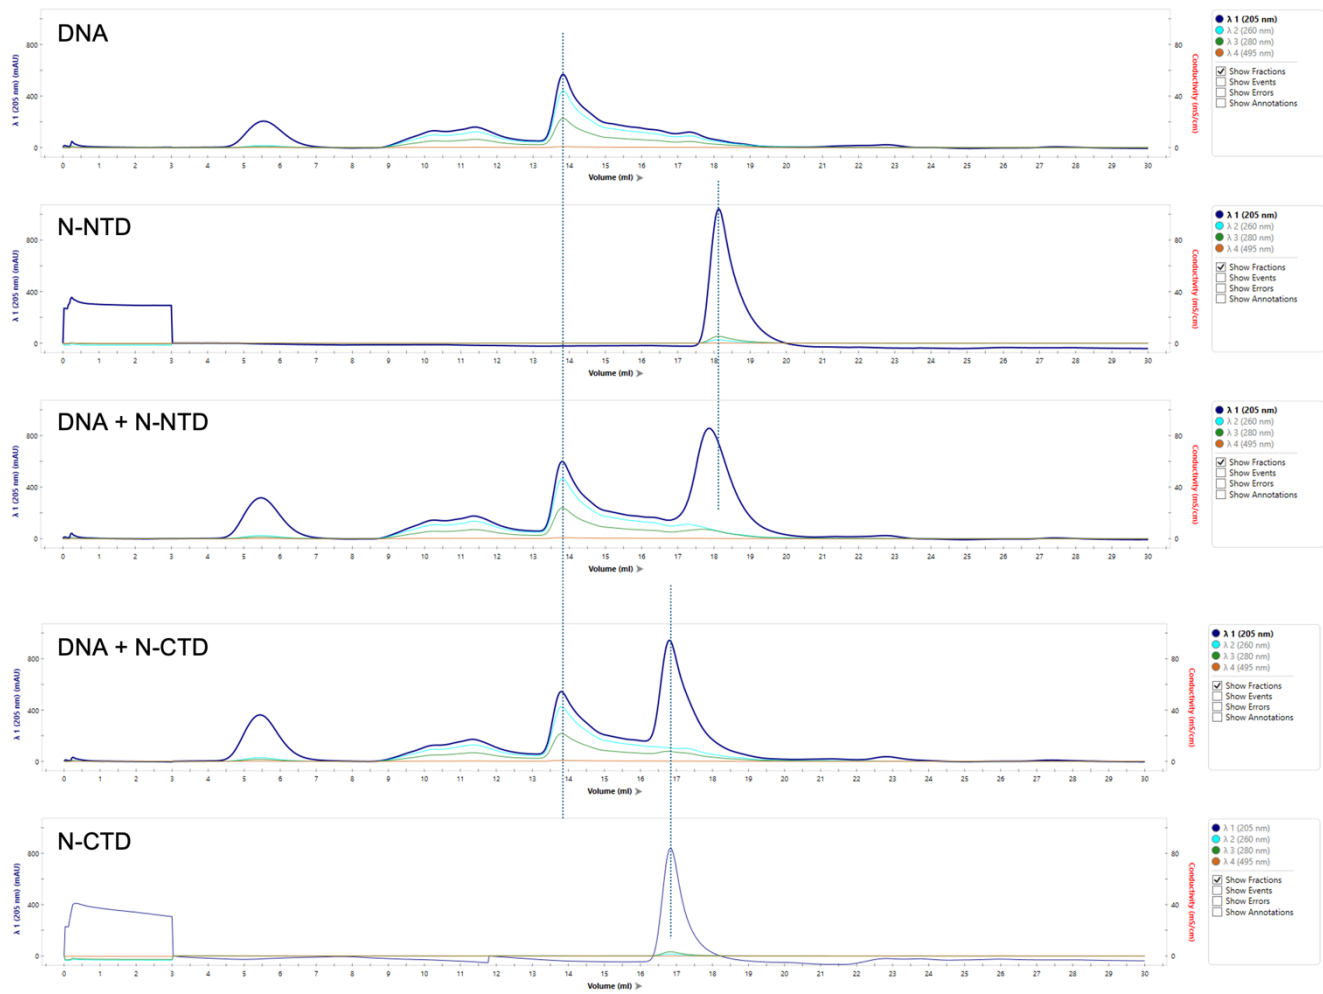

RNA aptamer 1 from Ahn et al., *Analyst*. 2009, 134, 1896-1901  
 rUrGrUrCrGrUrUrCrGrCrUrGrUrCrUrUrGrCrUrArCrGrUrUrArCrGrUrUrArCrArCrGrGrUrUrGrGrCrA

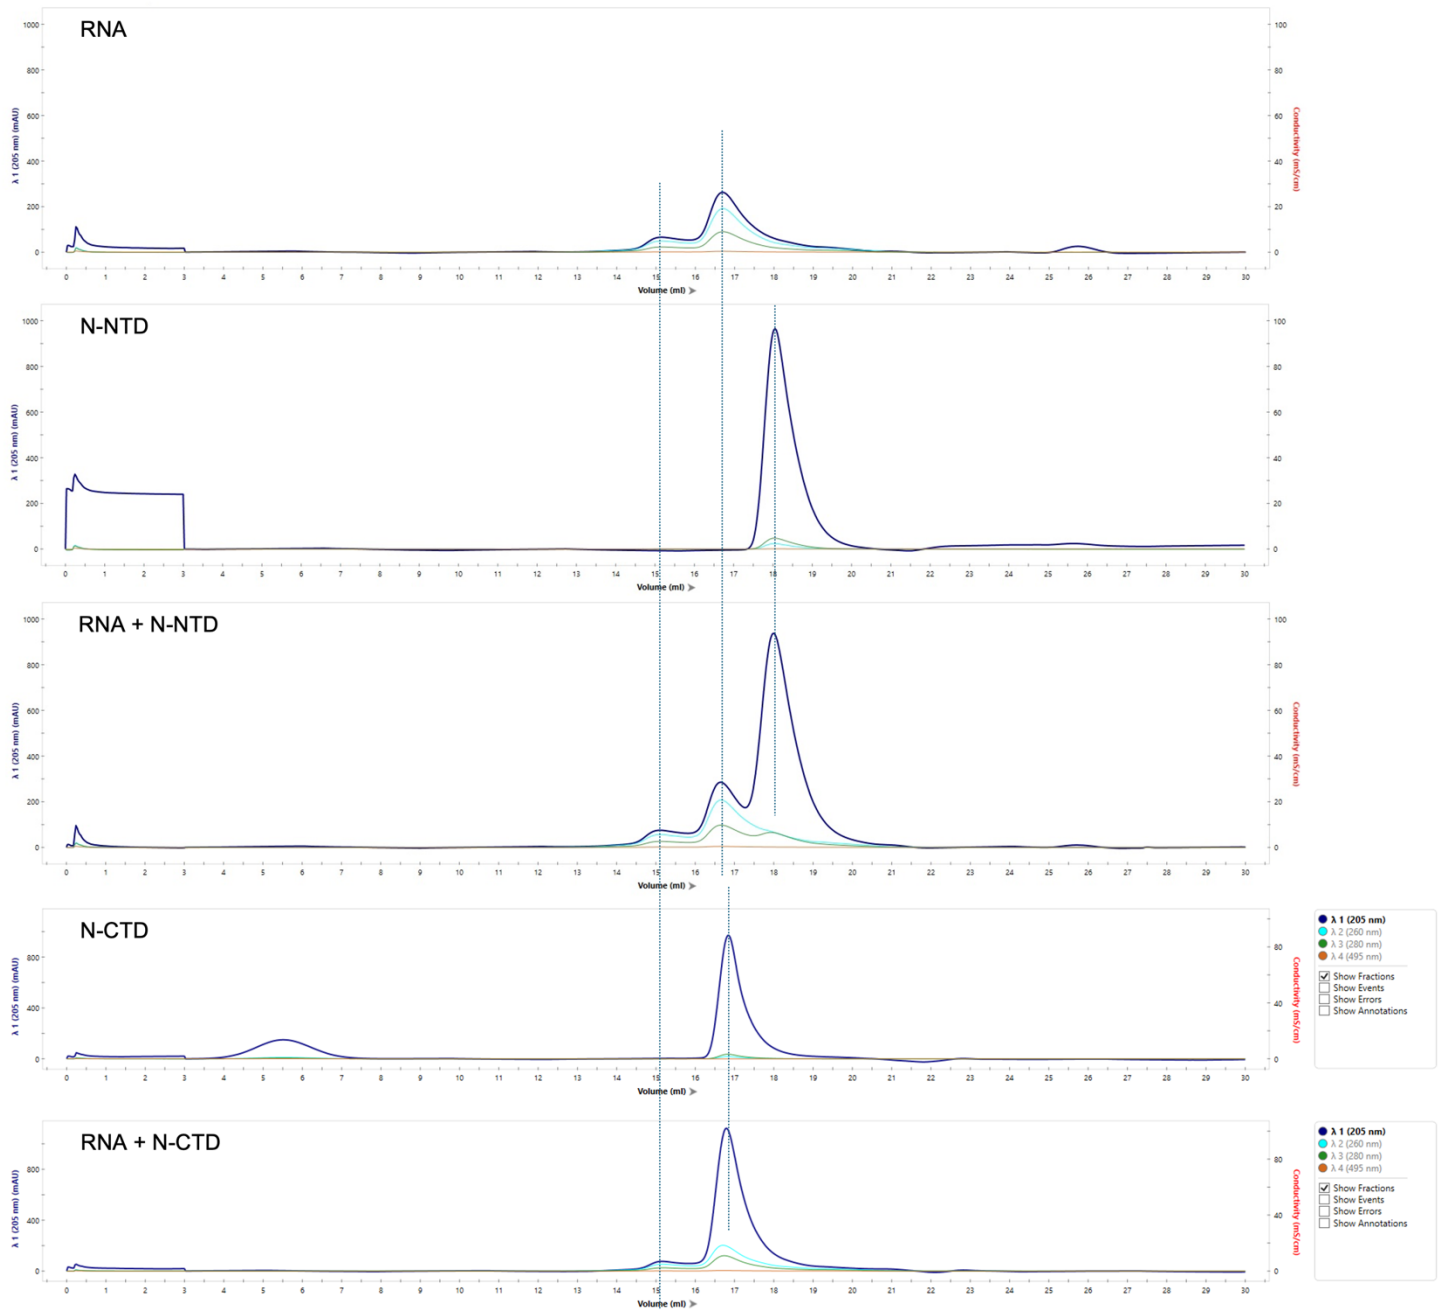





RNA SL3-TRS  
rGrUrUrCrUrCrUrArArArCrGrArArC

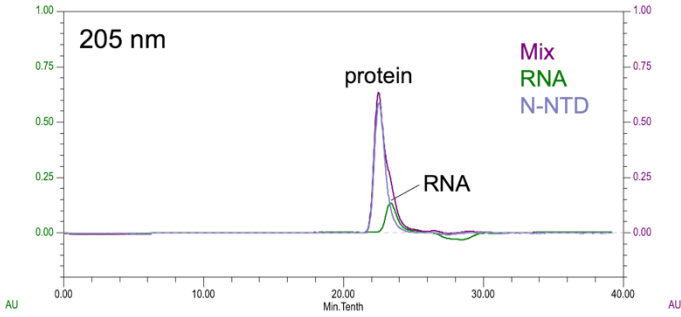

RNA SL4a  
rGrGrCrUrGrCrArUrGrCrU

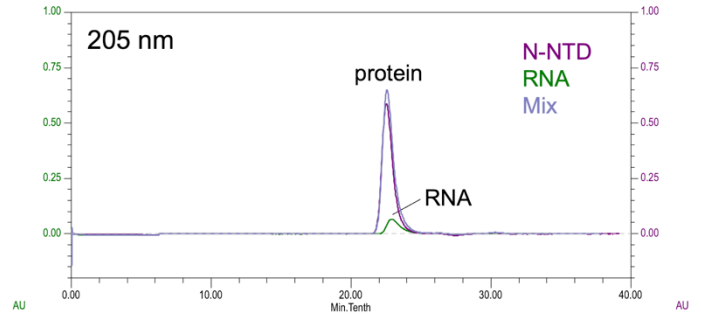

RNA SL3-TRS

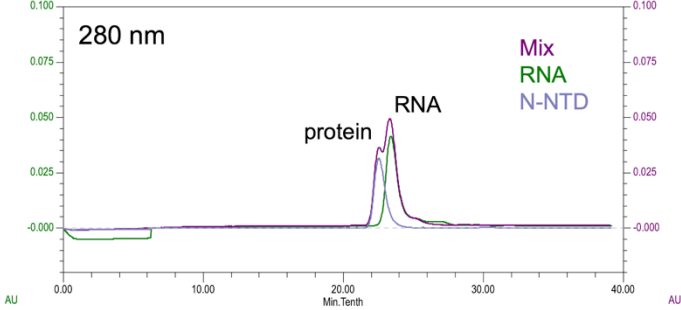

RNA SL4a

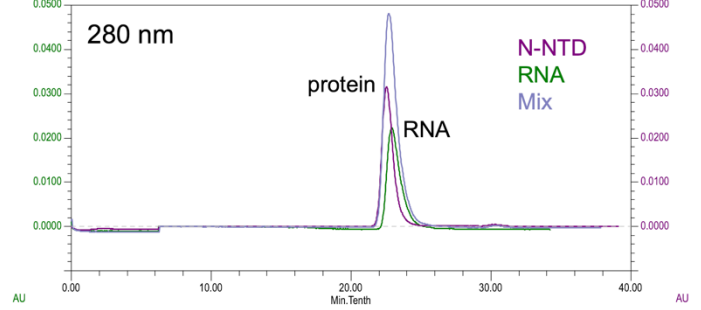

RNA SL4b  
rUrArArUrArArCrUrArArUrUrA

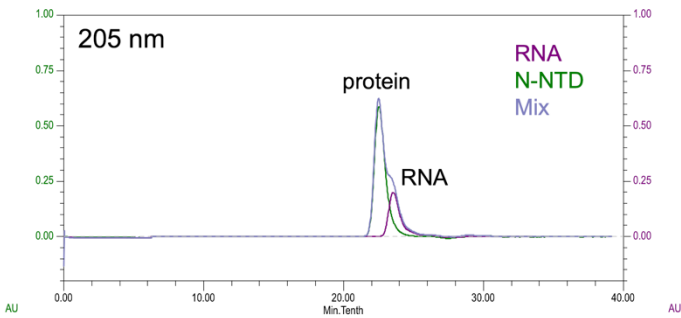

RNA SL5a  
rArCrGrGrUrUrUrCrGrUrCrCrGrU

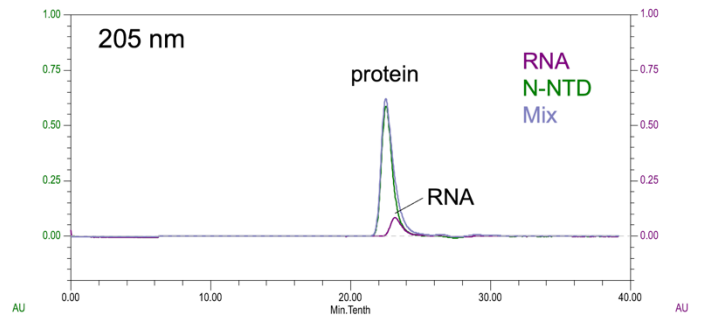

RNA SL4b

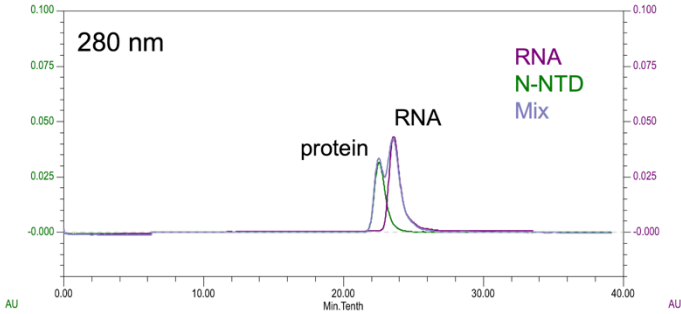

RNA SL5a

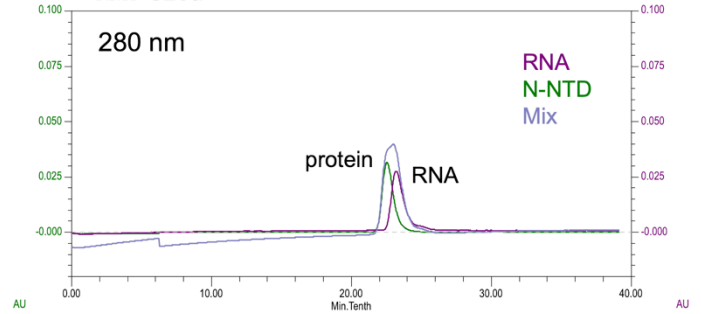

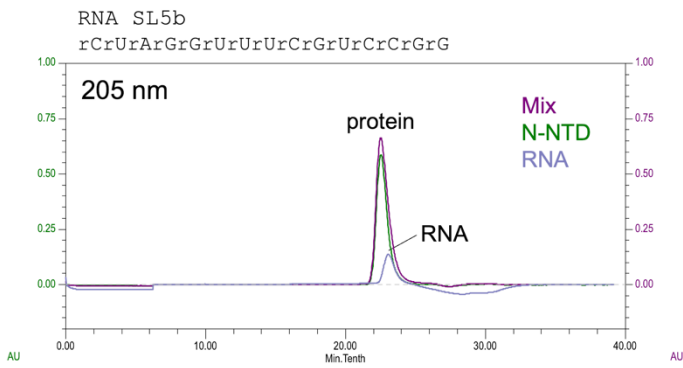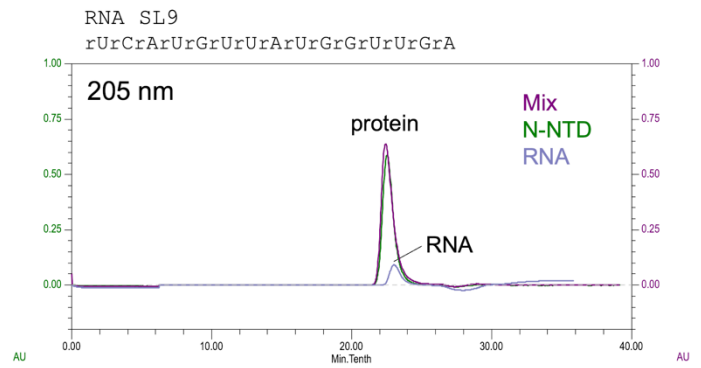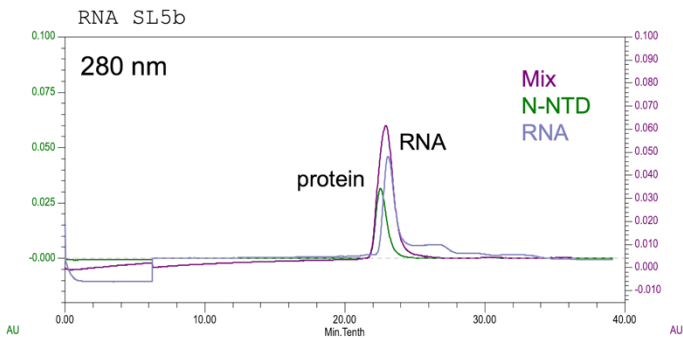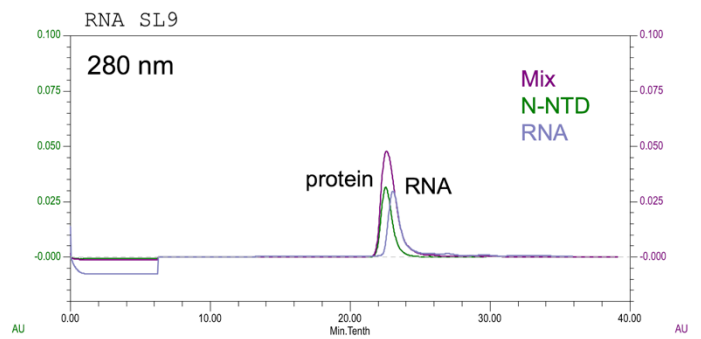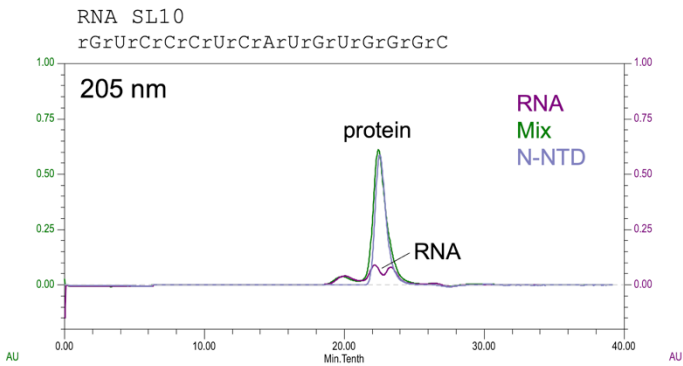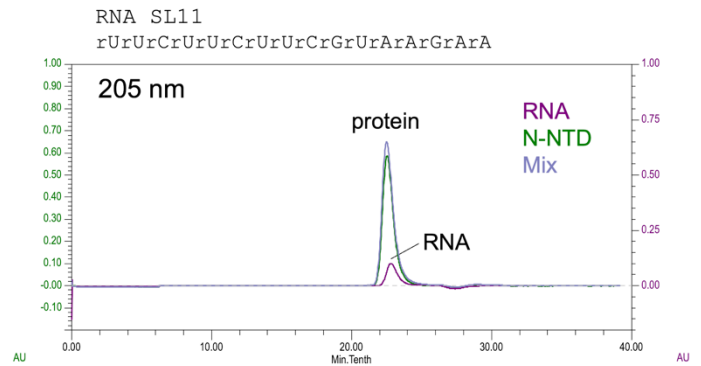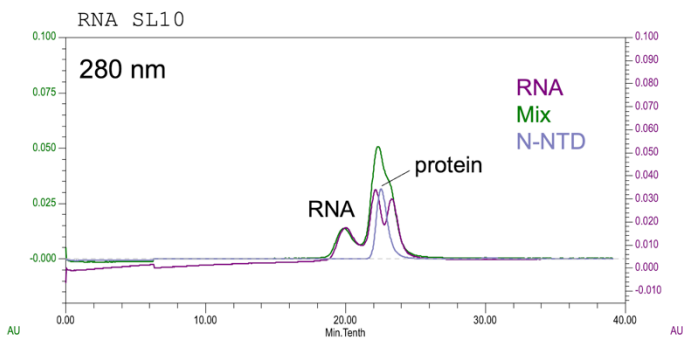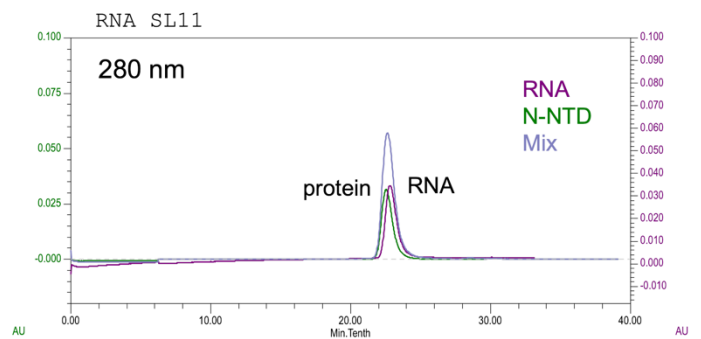

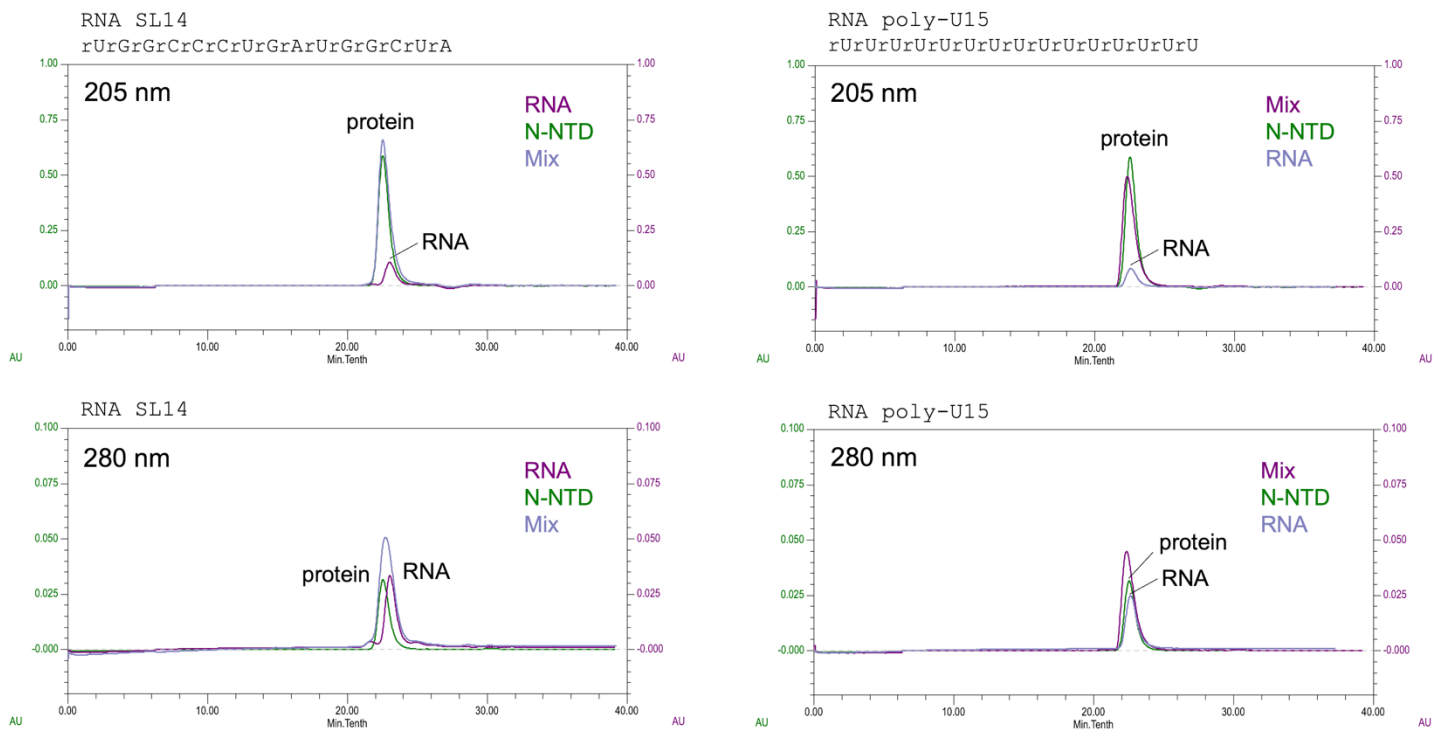

**Figure S2. SEC binding analyses of viral stem-loop RNA motifs to N-NTD**

Overlaid chromatograms for individual (protein or RNA alone) injections and their co-injection into a Superdex 200 10/300 column, monitored at two wavelengths. The flow rate was  $0.75 \text{ mL min}^{-1}$ . Although these RNA oligonucleotides did not form stable enough complexes with N-NTD detectable by co-elution in SEC, some of them showed modest affinity to N-NTD in the competitive fluorescence anisotropy assay (Fig. 9, Supplementary Figure S7, and Supplementary Table S2).

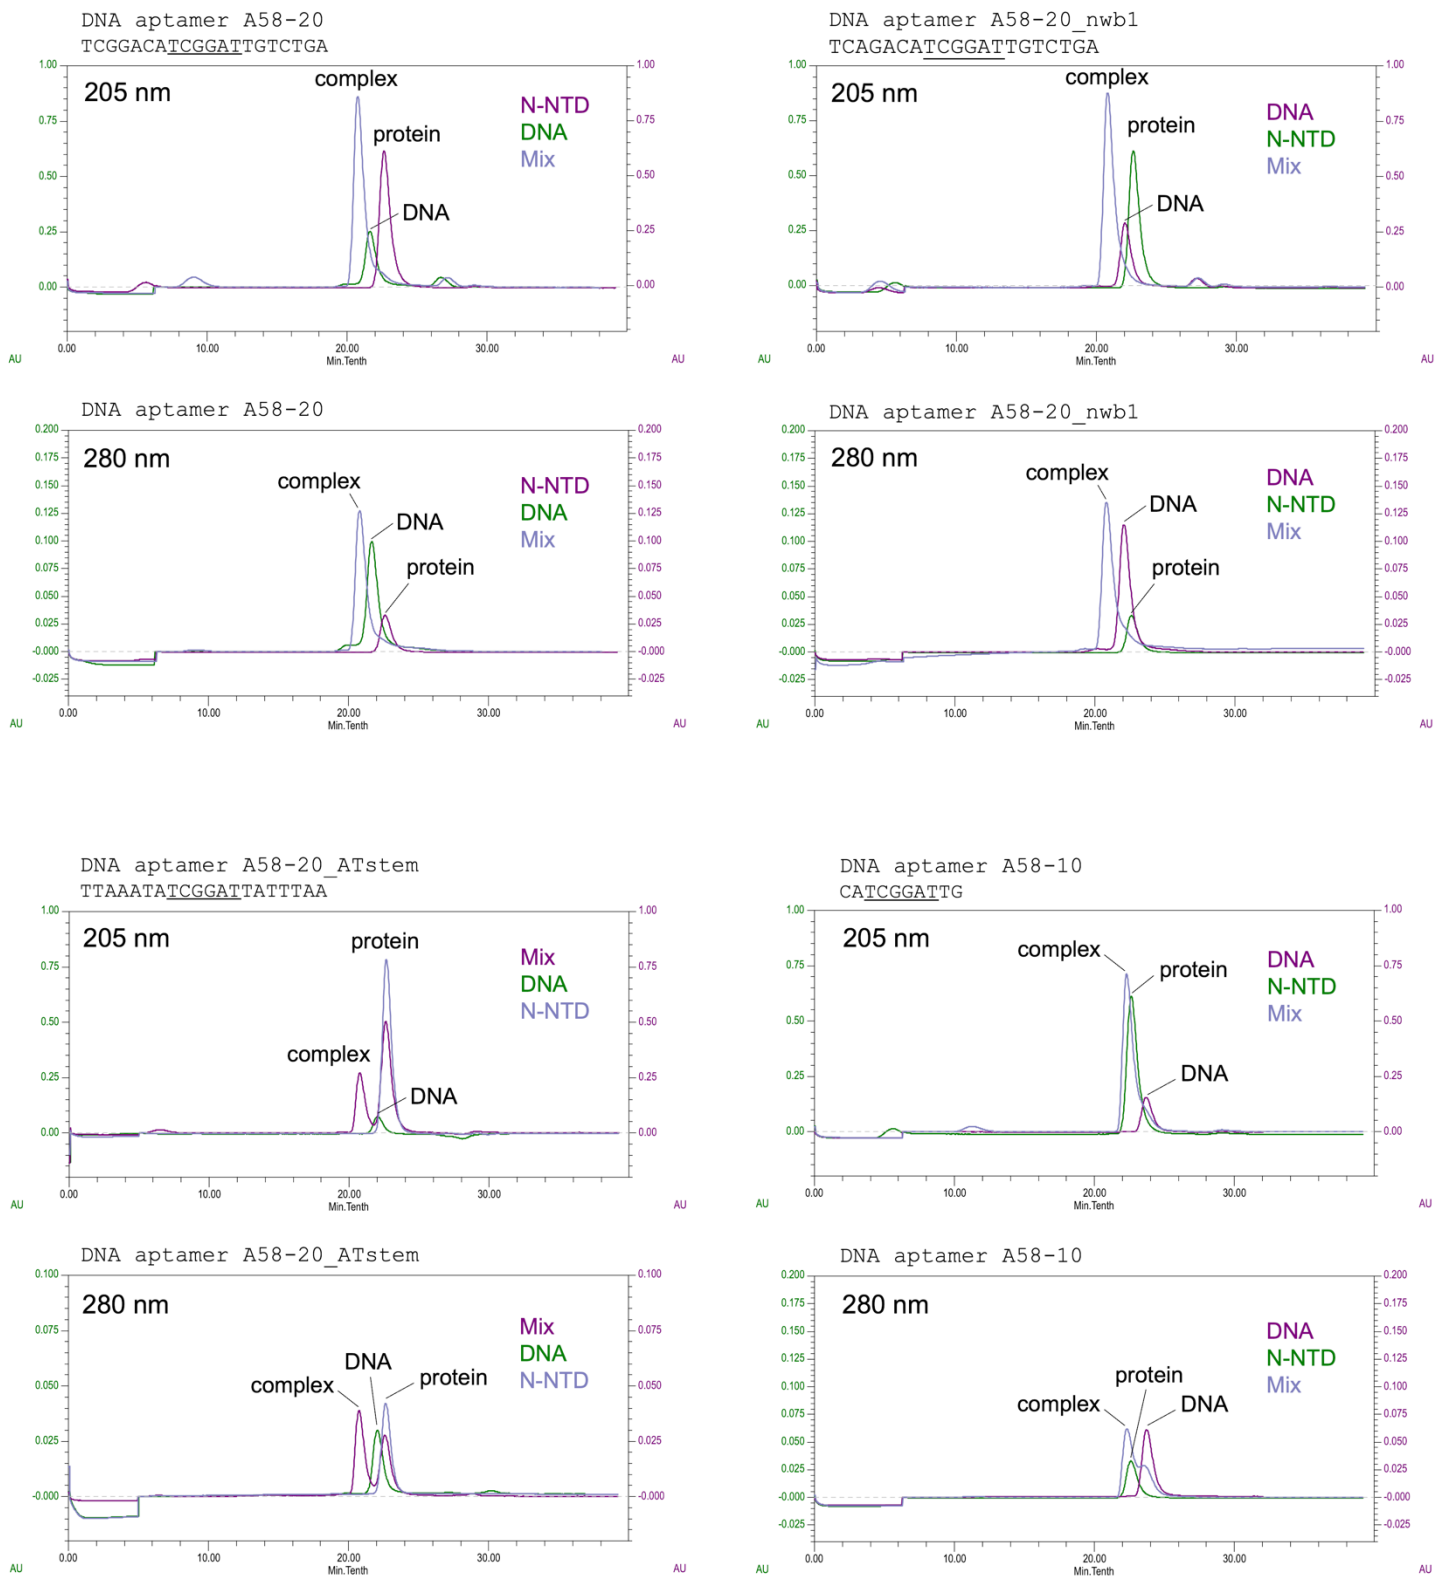

**Figure S3. SEC binding analyses of A58 aptamer derivatives to N-NTD (co-elution observed)**

Overlaid chromatograms for individual (protein or DNA alone) injections and their co-injection into a Superdex 200 10/300 column, monitored at two wavelengths. The flow rate was  $0.75 \text{ mL min}^{-1}$ . Note the co-elution of N-NTD-DNA complexes earlier than the protein or DNA alone.

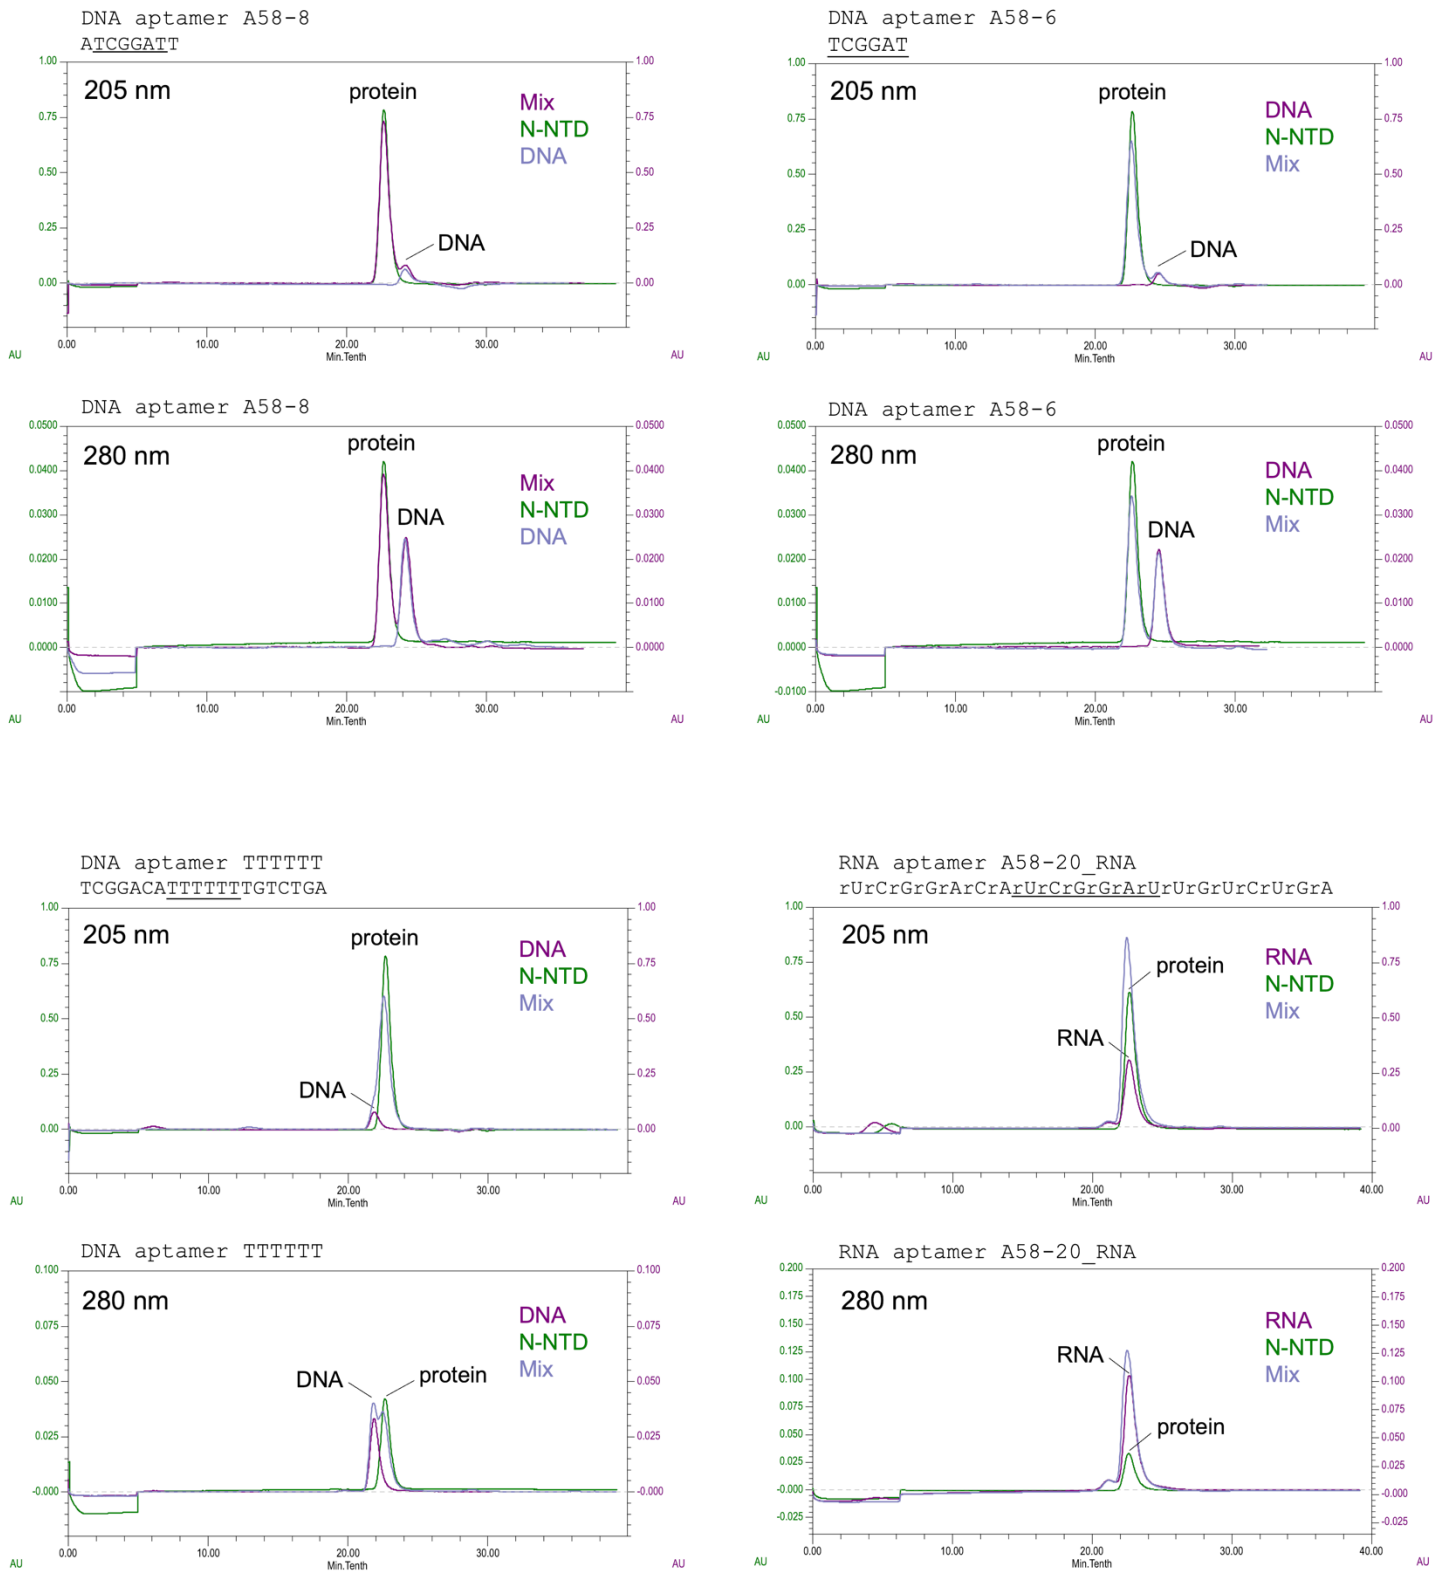

**Figure S4. SEC binding analyses of A58 aptamer derivatives to N-NTD (co-elution not observed)**

Overlaid chromatograms for individual (protein or nucleic acid alone) injections and their co-injection into a Superdex 200 10/300 column, monitored at two wavelengths. The flow rate was  $0.75 \text{ mL min}^{-1}$ .

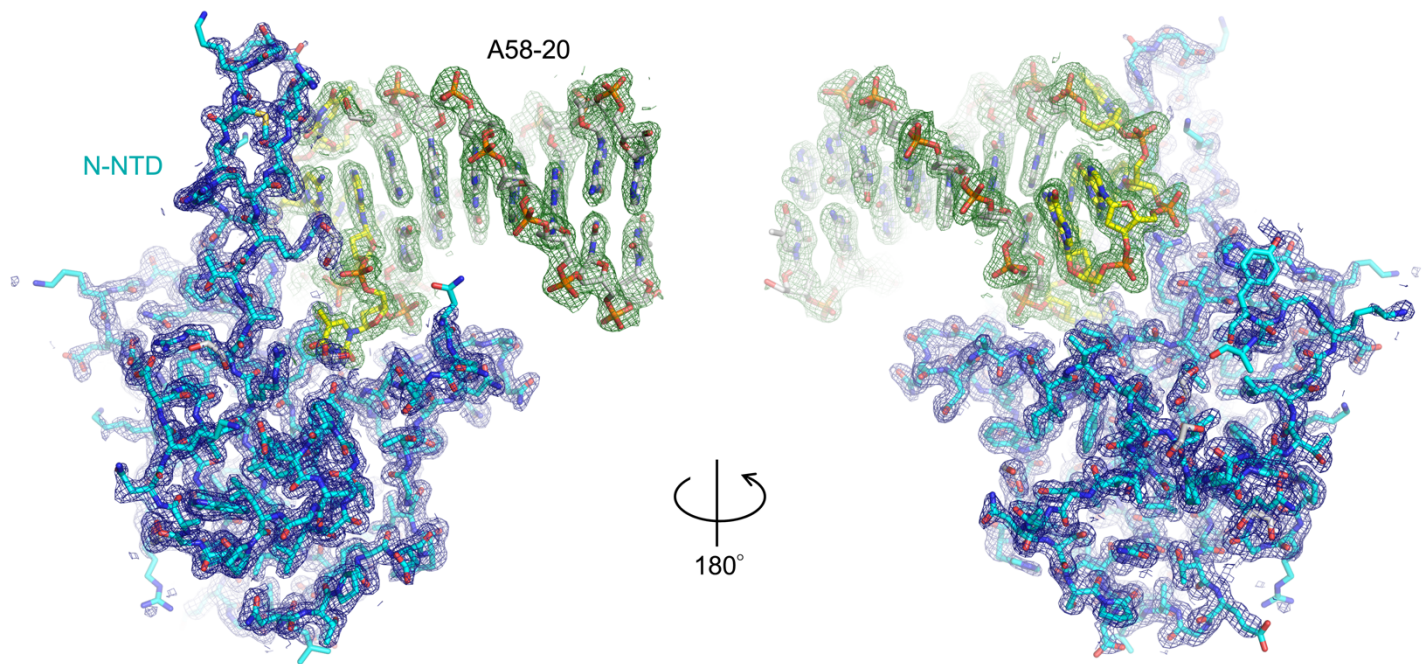

**Figure S5. Electron density map for the N-NTD / A58-20 complex at 1.55-Å resolution**

The 2mFo-DFc electron density map contoured at  $1.0 \sigma$  is shown as a blue (within 2.2 Å from any atom in the protein) or green (within 2.2 Å from any atom in the DNA) mesh. The N-NTD and A58-20 molecules are shown as sticks, colored as in Fig. 4.

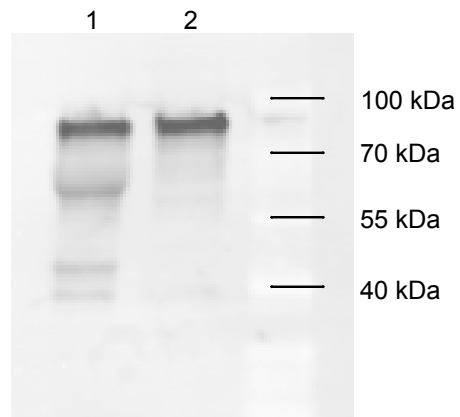

**Figure S6. Western blot of N-GFP and N-GFP Y109A proteins**

Whole cell lysate from 293T cells transfected with a plasmid DNA for expressing 1) N-GFP or 2) N (Y109A)-GFP was resolved by SDS-PAGE, transferred to a PVDF membrane and incubated with anti-N protein antibody 1:2500 (Sino Biological 40143-MM05) and LICOR IRDye 800CW anti-Mouse IgG 1:20,000 (Li-Cor 925-32210). The result shows comparable expression levels of the two proteins.

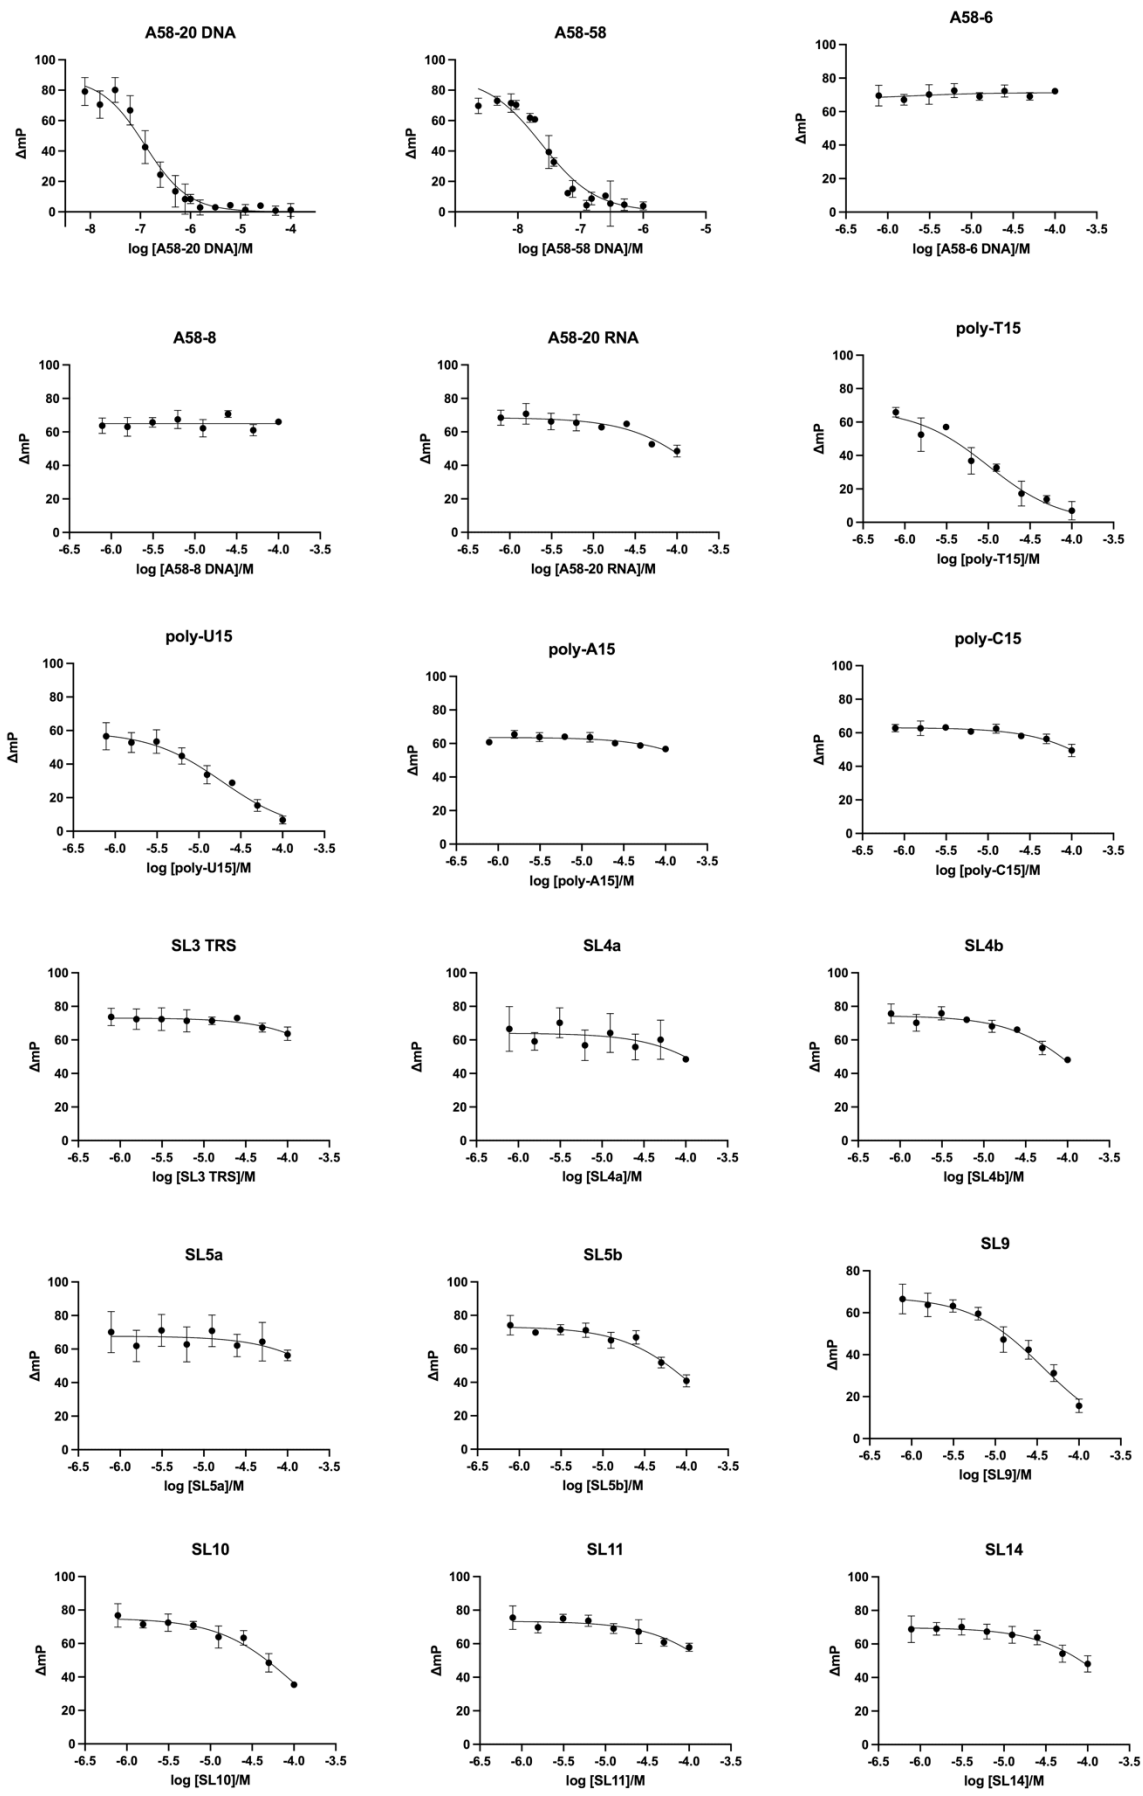

Figure S7: Competitive binding of DNA and RNA motifs to N-NTD (individual graphs for data in Fig. 9)



## Supplementary Table S1

Summary of  $K_D$  values for N-NTD binding measured using fluorescence anisotropy

| Name                  | Sequence                                             | $K_D$          | 95% confidence interval |
|-----------------------|------------------------------------------------------|----------------|-------------------------|
| A58-20 (A58-20-3'FAM) | TCGGACAT <u>TCGGATTGTCTGA</u> /36-FAM/               | 101 nM         | 91.4 to 110             |
| 2'FG3                 | TCGGACATC/ <u>i2FG/GATTGTCTGA</u> /36-FAM/           | 74.0 nM        | 60.9 to 89.4            |
| A58_20_Nwb1           | TCAGACAT <u>TCGGATTGTCTGA</u> /36-FAM/               | 84.9 nM        | 65.5 to 109             |
| A58_20_Nwb2           | TCGGACAT <u>TCGGATTGTCCGA</u> /36-FAM/               | 87.9 nM        | 72.0 to 107             |
| A58-10                | CAT <u>TCGGATTG</u> /36-FAM/                         | 2.27 $\mu$ M   | 1.91 to 2.69            |
| TTTTTT                | TCGGACAT <u>TTTTTTGTCTGA</u> /36-FAM/                | >6.1 $\mu$ M   |                         |
| T6-to-A               | TCGGACAT <u>TCGGAATGTCTGA</u> /36-FAM/               | Not determined |                         |
| C2-to-G               | TCGGACAT <u>TGGGATTGTCTGA</u> /36-FAM/               | Not determined |                         |
| NNNNNN                | TCGGACAN <u>NNNNNNTGTCTGA</u> /36-FAM/               | Not determined |                         |
| A58-20_RNA            | rUrCrGrGrArCrArUrCrGrGrArUrUrGrUrC<br>rUrGrA/36-FAM/ | Not determined |                         |
| A58-20-iT6FAM         | TCGGACAT <u>TCGGA/i6-FAMK/TGTCTGA</u>                | 74.0 nM        | 64.9 to 84.1            |
| A58-20-2'FG3-iT6FAM   | TCGGACATC/ <u>i2FG/GA/i6-FAMK/TGTCTGA</u>            | 13.9 nM        | 10.0 to 18.8            |

The hexanucleotide loop region is underlined. 'N' denotes a random base. 'r' denotes a ribonucleotide.

36-FAM: 3'-fluorescein

i2FG: 2'-deoxy-2'- $\alpha$ -fluoroguanosine

i6-FAMK: 2'-deoxyuridine with fluorescein attached to the pyrimidine C5 position

## Supplementary Table S2

Summary of  $K_i$  values estimated using a competition-based fluorescence anisotropy assay (Fig. 9 and Fig. S7)

| Name       | Sequence                                                       | $K_i$         | 95 % confidence interval |
|------------|----------------------------------------------------------------|---------------|--------------------------|
| A58-20     | TCGGACATCGGATTGTCTGA                                           | 50.5 nM       | 38.5 to 66.2             |
| A58-58     | GCTGGATGTCACCGGATTGTCGGACATCGGATTGTCTGAGT<br>CATATGACACATCCAGC | 9.92 nM       | 7.68 to 12.9             |
| A58-6      | TCGGAT                                                         | No inhibition |                          |
| A58-8      | ATCGGATT                                                       | No inhibition |                          |
| A58-20_RNA | rUrCrGrGrArCrArUrCrGrGrArUrUrGrUrCrUrGrA                       | 90.8 $\mu$ M  | 67.7 to 129              |
| poly-T15   | TTTTTTTTTTTTTTTT                                               | 4.12 $\mu$ M  | 2.82 to 6.05             |
| poly-U15   | rUrUrUrUrUrUrUrUrUrUrUrUrUrUrUrU                               | 7.80 $\mu$ M  | 5.79 to 10.6             |
| poly-A15   | rArArArArArArArArArArArArArArA                                 | >200 $\mu$ M  |                          |
| poly-C15   | rCrCrCrCrCrCrCrCrCrCrCrCrCrCrCrC                               | 153 $\mu$ M   | 119 to 209               |
| SL3-TRS    | rGrUrUrCrUrCrUrArArArCrGrArArC                                 | 283 $\mu$ M   | 169 to 713               |
| SL4a       | rGrGrCrUrGrCrArUrGrCrU                                         | 144 $\mu$ M   | 66.3 to 981              |
| SL4b       | rUrArArUrArArCrUrArArUrUrA                                     | 69.7 $\mu$ M  | 55.6 to 90.0             |
| SL5a       | rArCrGrGrUrUrUrCrGrUrCrCrGrU                                   | 226 $\mu$ M   | >93                      |
| SL5b       | rCrUrArGrGrUrUrUrCrGrUrCrCrGrG                                 | 53.7 $\mu$ M  | 43.0 to 68.6             |
| SL9        | rUrCrArUrGrUrUrArUrGrGrUrUrGrA                                 | 15.4 $\mu$ M  | 12.2 to 19.6             |
| SL10       | rGrUrCrCrCrUrCrArUrGrUrGrGrGrC                                 | 38.7 $\mu$ M  | 30.8 to 49.5             |
| SL11       | rUrUrCrUrUrCrUrUrCrGrUrArArGrArA                               | 131 $\mu$ M   | 92.2 to 207              |
| SL14       | rUrGrGrCrCrCrUrGrArUrGrGrCrUrA                                 | 86.4 $\mu$ M  | 63.1 to 127              |

'r' denotes a ribonucleotide.
